# Supplementary material
Source: publisher site journal article supplement (https://www.dovepress.com/get_supplementary_file.php?f=280187.docx)
Supplement: Supplementary file 1 [file get_supplementary_file.php]

**Supporting information**

Reactive oxygen species-mediated inflammation and apoptosis in hand-foot syndrome induced by PEGylated liposomal doxorubicin

Xiaolin Hu,a,b Mengmeng Dong,b Xiao Liang,b Ziling Liu,a,* Quanshun Lib,*

*aDepartment of Cancer Center, The First Hospital of Jilin University, Changchun 130012, China*

*bKey Laboratory for Molecular Enzymology and Engineering of Ministry of Education, School of Life Sciences, Jilin University, Changchun 130012, China*

*Corresponding author.

Tel.: +86-431-85155201; Fax: +86-431-85155200.

E-mail: [quanshun@jlu.edu.cn](mailto:quanshun@jlu.edu.cn) (Q. Li); [ziling@jlu.edu.cn](mailto:ziling@jlu.edu.cn) (Z. Liu).


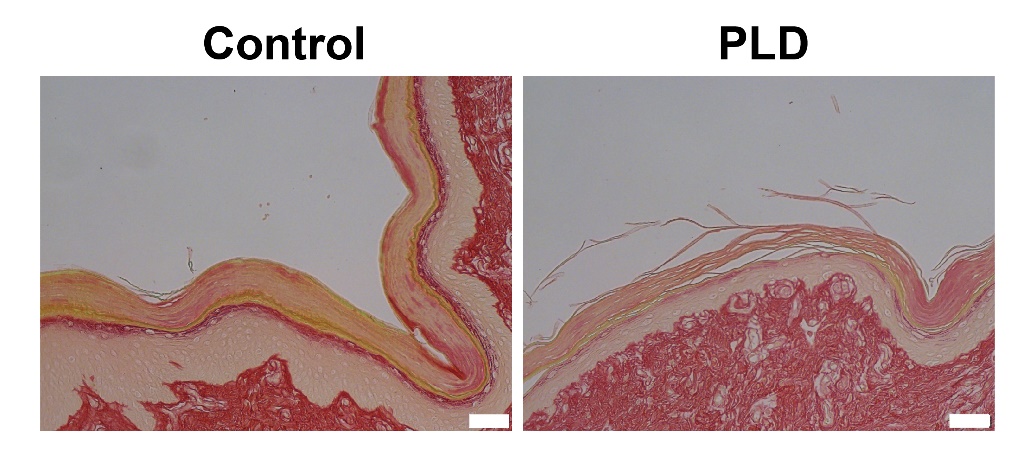


**Figure S1.** The picrosirius red staining of the paws’ skin tissues observed under non-polarized light microscopy. Scale bar: 50 μm.


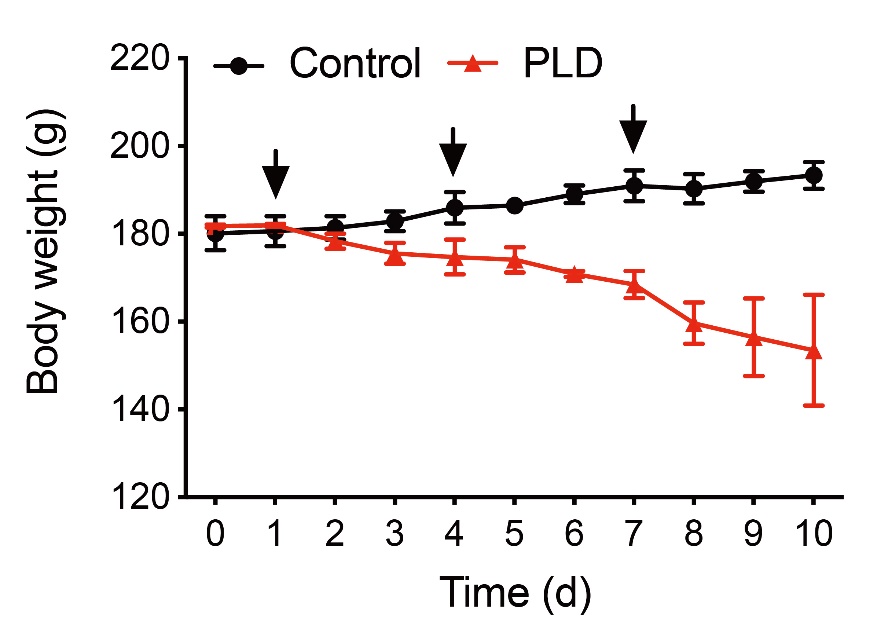


**Figure S2.** The change of rats’ body weight after the PLD administration.


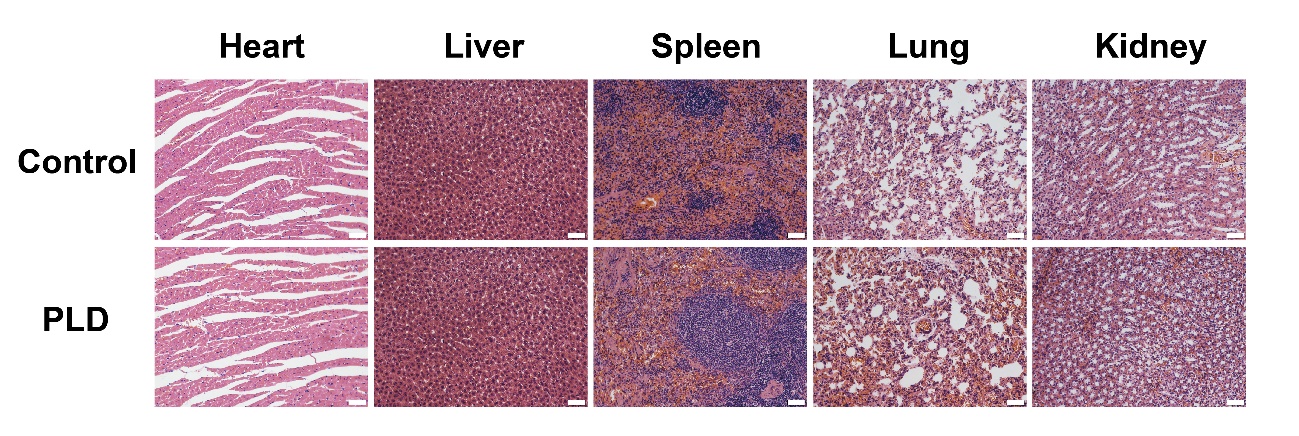


**Figure S3.** Histological analysis of main organs in normal rats and PLD-treated rats. Scale bar: 50 μm.


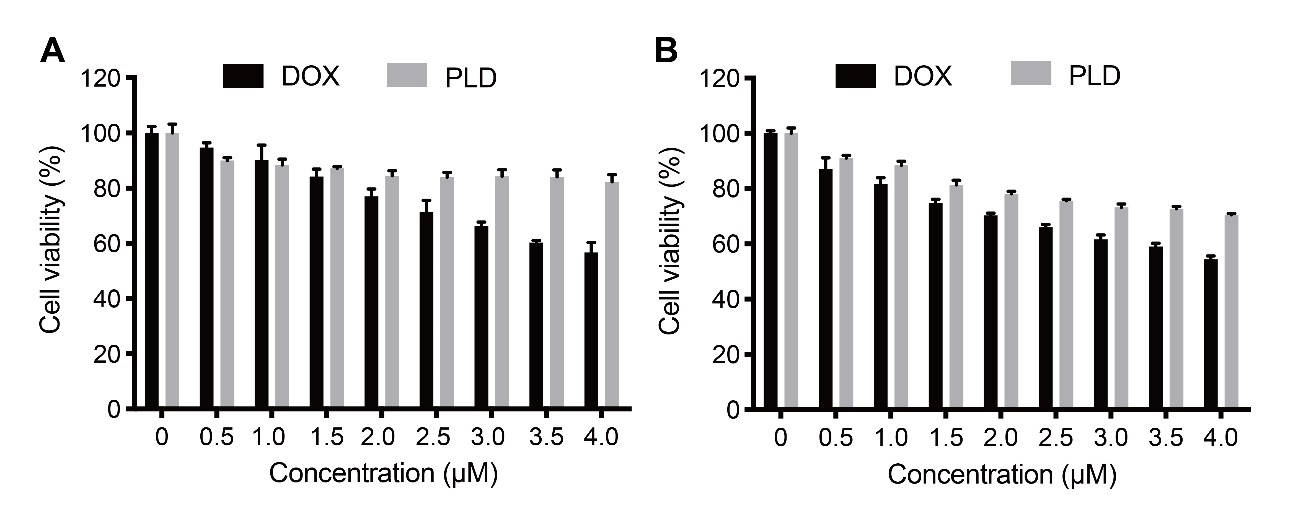


**Figure S4.** The cytotoxicity analysis of HaCat cells treated with DOX and PLD at various concentrations for 24 h (A) and 48 h (B).
